# Supplementary material
Source: PubMed Central journal article supplement (PMC2700328)
Supplement: blood-2008-09-179168_1.pdf [file blood-2008-09-179168_1.pdf]

Cell Lines:

|             | Status: |     | Original Description                                              |
|-------------|---------|-----|-------------------------------------------------------------------|
|             | KSHV    | EBV |                                                                   |
| BC-1        | +       | +   | Cesarman, E., et al., Blood, 1995. 86(7): p. 2708-14.             |
| BC-2        | +       | +   | Cesarman, E., et al., Blood, 1995. 86(7): p. 2708-14.             |
| BC-5        | +       | +   | Guasparri, I., et al. J Exp Med, 2004. 199(7): p. 993-1003        |
| CRO-AP2     | +       | +   | Carbone, A., et al., Int J Cancer, 1997. 73(4): p. 562-9.         |
| CRO-AP5     | +       | +   | Carbone, A., et al., Br J Haematol, 1998. 102(4): p. 1081         |
| BC-3        | +       | -   | Arvanitakis, L., et al., Blood, 1996. 88(7): p. 2648-54.          |
| BCBL-1      | +       | -   | Komanduri, K.V., et al., J AIDS Hum Retro, 1996. 13(3): p.215-26. |
| BCLM        | +       | -   | Ghosh, S.K., et al., Blood, 2003. 101(6): p. 2321-7.              |
| BCP-1       | +       | -   | Boshoff, C., et al., Blood, 1998. 91(5): p. 1671-9.               |
| HHB-2       | +       | -   | Gradoville, L., et al., J Virol, 2000. 74(13): p. 6207-12.        |
| TY1         | +       | -   | Katano, H., et al.. J Med Virol, 1999. 58(4): p. 394-401.         |
| VG-1        | +       | -   | Brander, C., et al., J Infect Dis, 2001. 184(2): p. 119-26.       |
| HUVEC-K.cl2 | +       | -   | Wang, L., and Damania, B. Cancer Res. 2008; 68(12):4640-8.        |
| HUVEC-K.cl1 | +       | -   | Wang, L., and Damania, B. Cancer Res. 2008; 68(12):4640-8.        |
| HUVEC.1     | -       | -   | Wang, L., and Damania, B. Cancer Res. 2008; 68(12):4640-8.        |
| HUVEC.2     | -       | -   | Wang, L., and Damania, B. Cancer Res. 2008; 68(12):4640-8.        |
| E1          | +       | -   | An et al. J. Virol. 2006 80(10): p4833 - 46                       |
| L1          | +       | -   | An et al. J. Virol. 2006 80(10): p4833 - 46                       |
