# Supplementary material
Source: PubMed Central journal article supplement (PMC2700328)
Supplement: blood-2008-09-179168_2.pdf [file blood-2008-09-179168_2.pdf]

| miRNA      | dCThuvecKSHV | dCThuvecMock | ttest |
|------------|--------------|--------------|-------|
| mir-152    | -1.5         | 15.97        | 0     |
| mir-181b   | -3.17        | 15.97        | 0     |
| mir-31     | -6.69        | -8.48        | 0     |
| mir-16     | -8.19        | -10.25       | 0     |
| mir-19b    | -5.83        | -8.36        | 0     |
| mir-220    | 15.09        | 6.1          | 0     |
| mir-338    | 15.09        | 6.58         | 0     |
| mir-204    | -0.15        | 2.07         | 0.01  |
| mir-10b    | -3.86        | -4.49        | 0.01  |
| mir-126    | -6.89        | -8.38        | 0.01  |
| mir-106a   | -3.71        | -5.53        | 0.01  |
| mir-15a    | 0            | -2.69        | 0.01  |
| mir-20a    | 15.09        | -7.31        | 0.01  |
| mir-376a   | -4.23        | -2.14        | 0.02  |
| mir-92     | -5.02        | -6.82        | 0.02  |
| let-7f     | -5.66        | -7           | 0.02  |
| mir-19a    | -6.28        | -8.14        | 0.02  |
| mir-142-3p | 0.22         | 3.68         | 0.03  |
| mir-9      | 1.88         | 3.96         | 0.04  |
| mir-323    | -2.13        | -1.07        | 0.04  |
| mir-155    | -3.69        | -4.28        | 0.05  |
| mir-21     | -8.72        | -9.64        | 0.05  |
| mir-140    | -2.91        | -3.95        | 0.05  |
| mir-15b    | -3.5         | -5.55        | 0.05  |
| mir-381    | 3.19         | 4.8          | 0.06  |
| mir-93     | -3.45        | -4.84        | 0.06  |
| mir-342    | -1.87        | -3.76        | 0.07  |
| mir-128a   | 9.09         | 15.97        | 0.08  |
| mir-17-5p  | -3.48        | -5.2         | 0.08  |
| let-7e     | -3.28        | -4.3         | 0.09  |
| mir-213    | -0.32        | -2.09        | 0.11  |
| mir-29b    | -2.78        | -1.39        | 0.13  |
| mir-98     | -2.26        | -2.86        | 0.14  |
| mir-128b   | 3.07         | 3.68         | 0.15  |
| let-7b     | -6.67        | -7.54        | 0.15  |
| mir-129    | 4.51         | 5.45         | 0.16  |
| mir-34a    | -3.39        | -2.07        | 0.16  |
| mir-192    | 2.66         | 0.75         | 0.16  |
| mir-296    | 6.9          | 6.53         | 0.16  |
| mir-148a   | 11.7         | 15.97        | 0.18  |
| mir-218    | -1.33        | -0.67        | 0.19  |
| mir-23a    | -1.95        | -3.48        | 0.19  |
| mir-107    | 1.11         | 0.27         | 0.2   |
| mir-125a   | -5.81        | -7.36        | 0.2   |
| mir-221    | -7.66        | -7.5         | 0.23  |
| let-7a     | -7.86        | -9.24        | 0.23  |
| mir-10a    | -18.04       | 15.97        | 0.25  |
| mir-103    | -4.33        | -5.6         | 0.26  |
| mir-216    | 3.59         | 2.53         | 0.31  |
| mir-135b   | 7.68         | 13.33        | 0.32  |
| mir-22     | -4.49        | -3.34        | 0.33  |
| mir-18a    | -3.41        | -4.36        | 0.33  |
| mir-23b    | -0.02        | 0.77         | 0.34  |
| mir-188    | 1.01         | 0.85         | 0.35  |
| mir-223    | 2.25         | 4.22         | 0.38  |
| mir-219    | 3.17         | 3.74         | 0.39  |
| mir-370    | -0.03        | 3.29         | 0.41  |
| mir-153    | 10.74        | 11.24        | 0.43  |
| mir-125b   | -7.96        | -8.28        | 0.45  |
| mir-30a-3p | -3.58        | -3.53        | 0.45  |
| mir-145    | 3.41         | 3.93         | 0.48  |
| mir-367    | 15.09        | 13.05        | 0.48  |
| mir-28     | -1.56        | -2.13        | 0.51  |
| mir-143    | 9.77         | 4.43         | 0.51  |
| mir-193a   | -1.47        | -0.74        | 0.53  |
| mir-149    | 5.85         | 7.39         | 0.54  |
| mir-181c   | -4.04        | -4.74        | 0.55  |
| mir-424    | -0.73        | -1.08        | 0.56  |
| mir-27b    | -1.17        | -0.86        | 0.59  |
| mir-325    | 10.43        | 7.04         | 0.59  |
| mir-138    | 11.27        | 5.97         | 0.66  |
| mir-181a   | -3.23        | -4.11        | 0.7   |
| mir-222    | -9.53        | -8.9         | 0.78  |
| mir-372    | 5.65         | 6.16         | 0.8   |
| mir-330    | 0.19         | 1.11         | 0.82  |
| mir-17-3p  | 5.76         | 3.53         | 0.87  |
| mir-150    | 5.19         | 7.46         | 0.88  |
| mir-124a   | 5.74         | 4.57         | 0.92  |
| mir-100    | -7.95        | -8.14        | 0.95  |
| mir-142-5p | 7.69         | 15.97        | 0.98  |
| mir-7      | 1.21         | 1.06         | 1     |
